# Supplementary material
Source: publisher site journal article supplement (https://www.dovepress.com/get_supplementary_file.php?f=427348.docx)
Supplement: Supplementary file 1 [file get_supplementary_file.php]

Supplementary Material

Study results

This supplementary material has been provided by the authors to give readers additional information about the study results.

Supplement to: Trends in abdominal aortic aneurysm repair incidence, comorbidity, treatment, and mortality: a Danish nationwide cohort study, 1996-2018.

# Table of content – Supplementary digital content

[Table of content – Supplementary digital content 1](#_Toc149637456)

[Supplemental eFigures 2](#_Toc149637457)

[eFigure 1. Study flow chart 2](#_Toc149637458)

[eFigure 2. Standardized incidence rate by indication and technique 3](#_Toc149637459)

[eFigure 3a. Trend in age specific incidence rates of all AAA repairs 4](#_Toc149637460)

[eFigure 3b. Trend in age specific incidence rates for intact and ruptured AAA 4](#_Toc149637461)

[eFigure 4. Plot of 5-year mortality hazard ratio following AAA repair compared to Danish residents aged 41-99 5](#_Toc149637462)

[eFigure 5. AAA Comorbidity-specific incidence, age- and sex standardized 6](#_Toc149637463)

[Supplemental eTables 7](#_Toc149637464)

[eTables 1: Annual incidence rate subgroup analyses, calendar year:covariate 7](#_Toc149637465)

[eTable 1a. Total AAA repair, annual change in repair incidence by subgruop 7](#_Toc149637466)

[eTable 1b. Ruptured AAA, annual change in repair incidence by subgruop 8](#_Toc149637467)

[eTable 1c. Intact AAA, annual change in repair incidence by subgruop 9](#_Toc149637468)

[eTable 2. Baseline characteristics by calendar period 10](#_Toc149637469)

[eTable 2a. Ruptured AAA 10](#_Toc149637470)

[eTable 2b. Intact AAA 11](#_Toc149637471)

[eTable 3. Sensitivity analyses of the AAA repair survival rates. 12](#_Toc149637472)

[eTable 4. Regression table of survival analyses 14](#_Toc149637473)

[eTable 4a. Ruptured AAA 14](#_Toc149637474)

[eTable 4b. Intact AAA. 14](#_Toc149637475)

[Miscellaneous 15](#_Toc149637476)

[CCI item coding used 15](#_Toc149637477)

[ICD8-Criteria for excluding patients with AAA surgery prior to 1996: 15](#_Toc149637478)

[Criteria for imputing the operation code from the Danish National Patient Registry based on substring match between the DNPR and DVR 16](#_Toc149637479)

[Additional baseline characteristics coding 16](#_Toc149637480)

[Age trend by indication 18](#_Toc149637481)

[Age trend by indication and technique 19](#_Toc149637482)

# Supplemental eFigures

## eFigure 1. Study flow chart


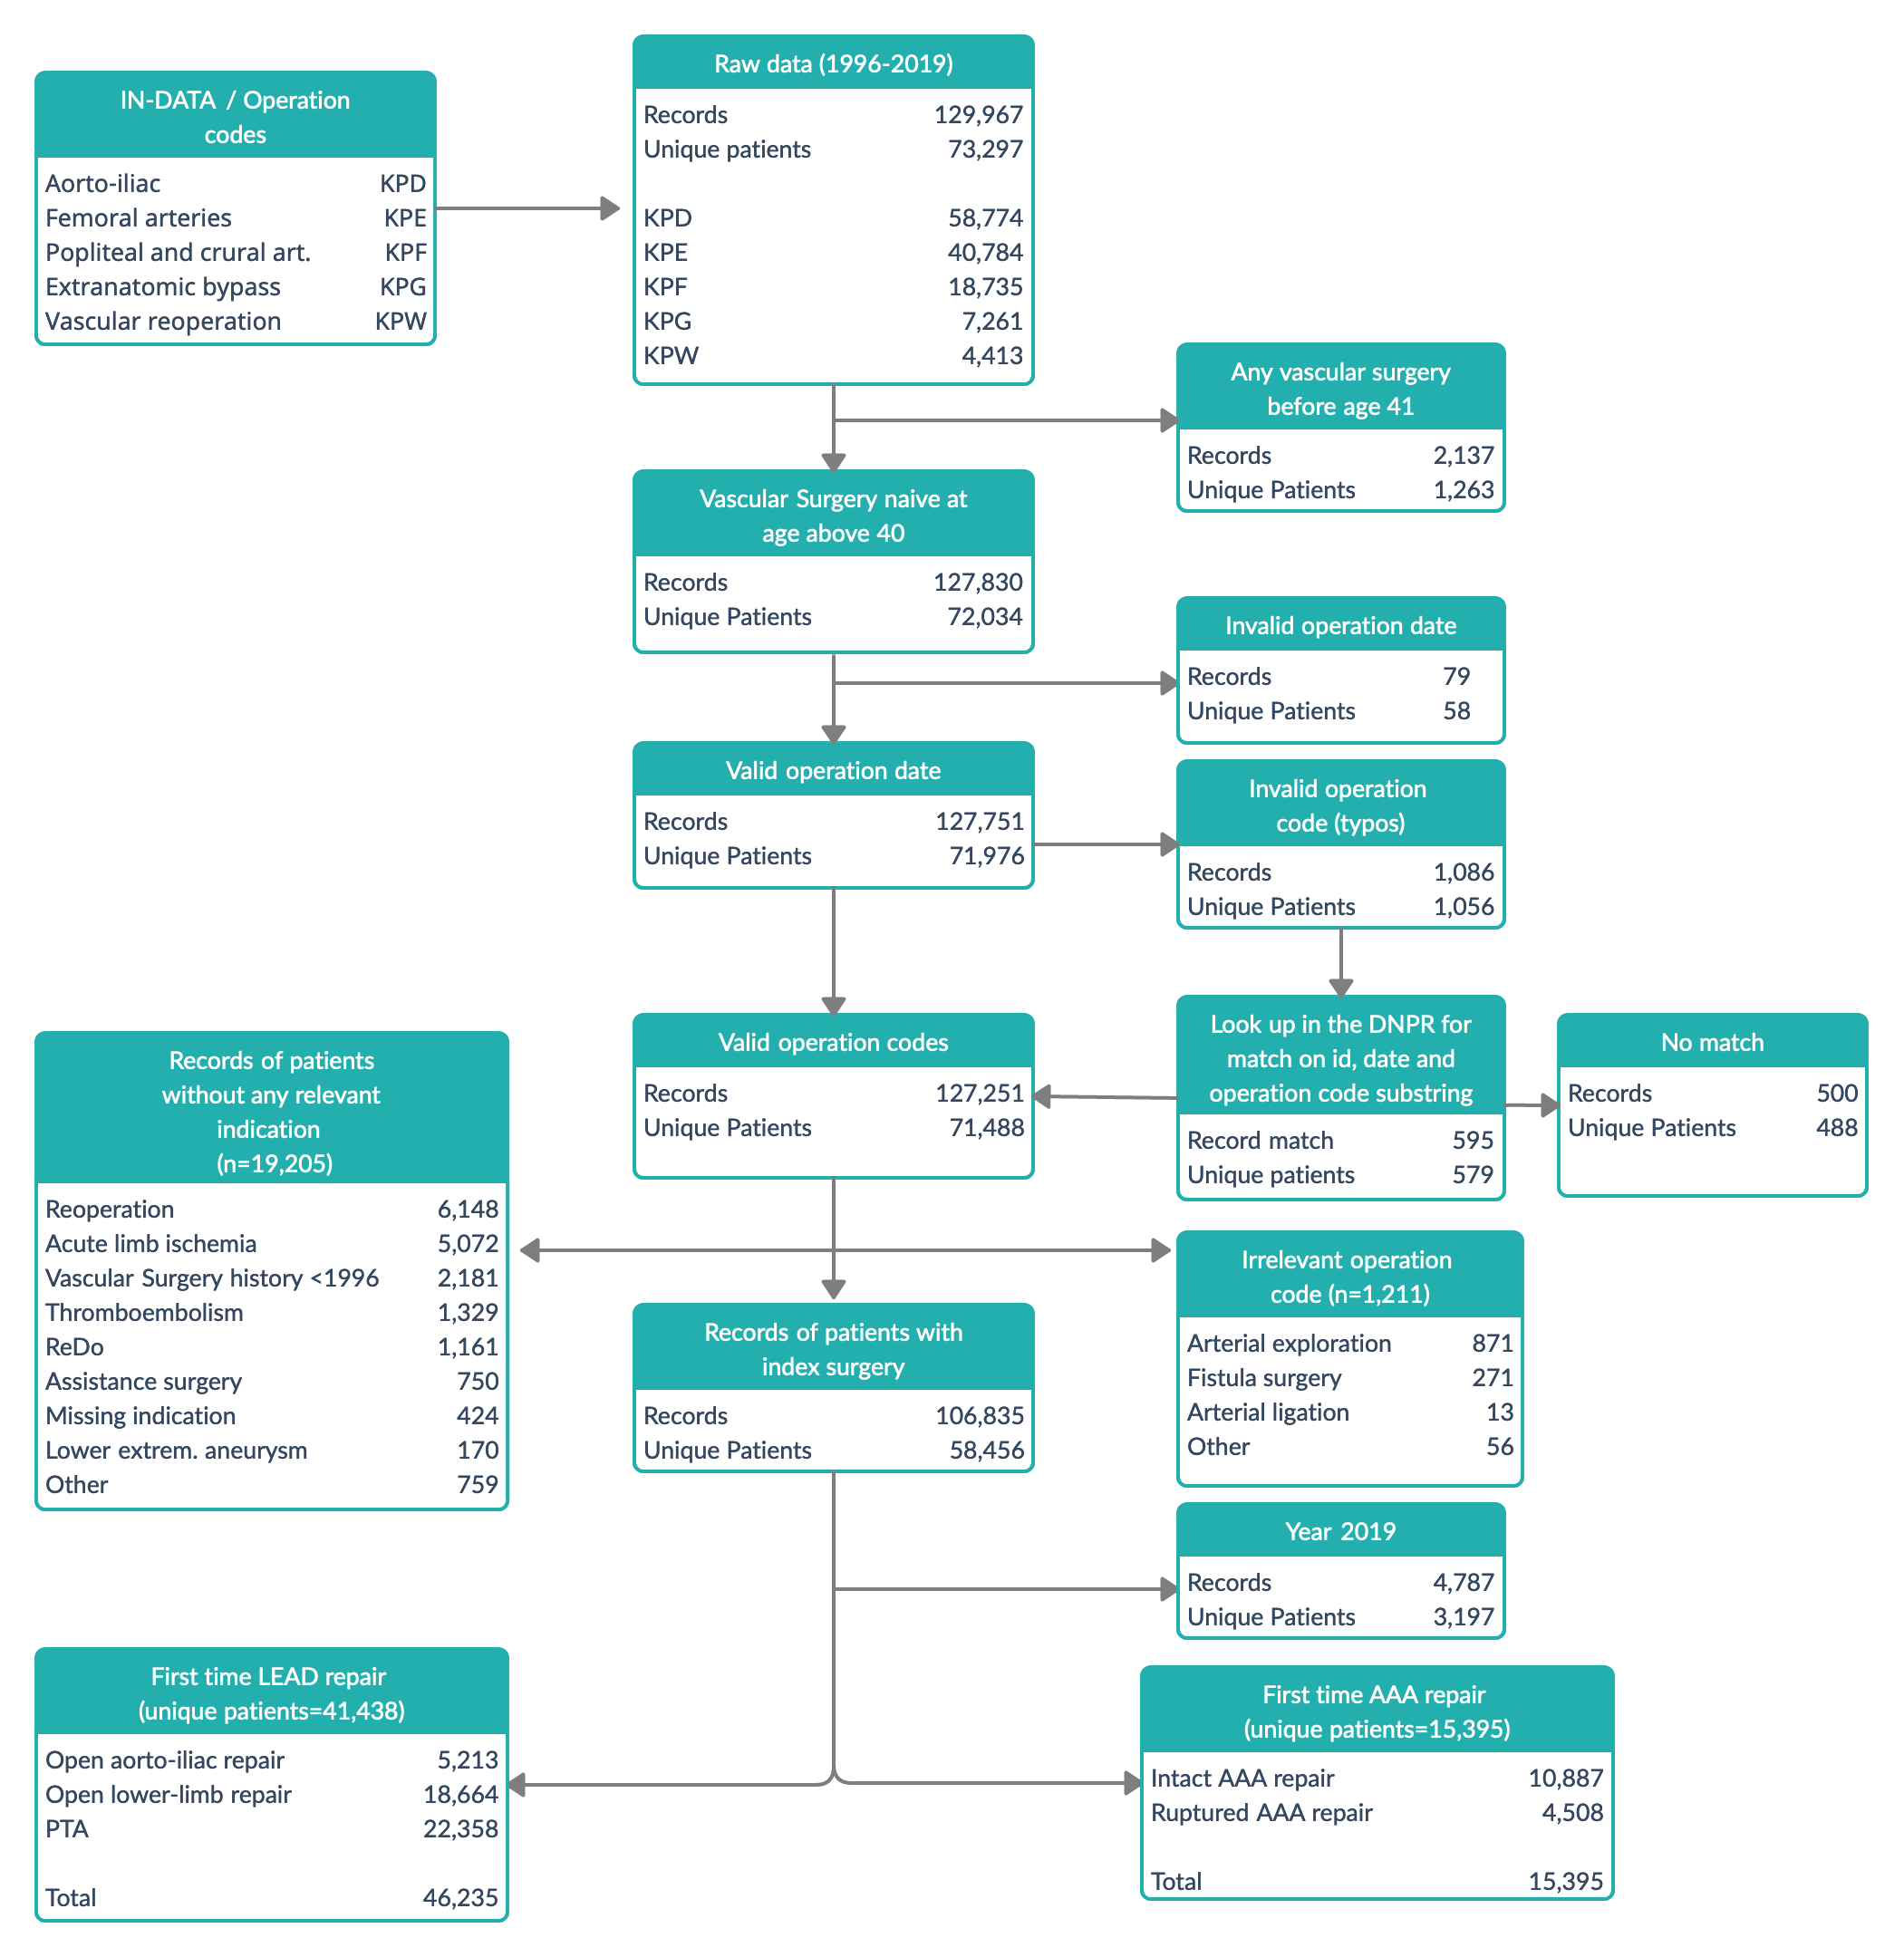


AAA, abdominal aortic aneurysm.

LEAD, lower extremity artery disease. The LEAD data set was prepared for another publication.

## eFigure 2. Standardized incidence rate by indication and technique

## eFigure 3a. Trend in age specific incidence rates of all AAA repairs

## eFigure 3b. Trend in age specific incidence rates for intact and ruptured AAA

Note, extreme age groups, 41-50 years and 91-99 years, were not plotted for clarity.

## eFigure 4. Plot of 5-year mortality hazard ratio following AAA repair compared to Danish residents aged 41-99

## eFigure 5. AAA Comorbidity-specific incidence, age- and sex standardized

iAAA, elective and symptomatic AAA (intact AAA). rAAA, ruptured AAA.

# Supplemental eTables

## eTables 1: Annual incidence rate subgroup analyses, calendar year:covariate

LYear, Calendar year as linear predictor.

IRR, annual incidence rate ratio.

CCI, Charlson’s comorbidity index.

### eTable 1a. Total AAA repair, annual change in repair incidence by subgruop

### eTable 1b. Ruptured AAA, annual change in repair incidence by subgruop

### eTable 1c. Intact AAA, annual change in repair incidence by subgruop

## eTable 2. Baseline characteristics by calendar period

### eTable 2a. Ruptured AAA

| **Ruptured AAA** | **Level** | **1996 - 1999 (n=880)** | **2000 - 2004 (n=1114)** | **2005 - 2009 (n=1000)** | **2010 - 2014 (n=907)** | **2015 - 2018 (n=607)** |
| --- | --- | --- | --- | --- | --- | --- |
| **Age** | mean (sd) | 72 (7) | 73 (8) | 73 (8) | 73 (8) | 74 (8) |
| **Male_sex** | Yes | 777 (88) | 976 (88) | 868 (87) | 777 (86) | 525 (86) |
| **CCI_group** | Normal | 379 (43) | 437 (39) | 367 (37) | 315 (35) | 229 (38) |
|  | Moderate | 260 (30) | 317 (28) | 291 (29) | 253 (28) | 157 (26) |
|  | Severe | 134 (15) | 177 (16) | 159 (16) | 169 (19) | 107 (18) |
|  | Very Severe | 107 (12) | 183 (16) | 183 (18) | 170 (19) | 114 (19) |
| **Dependency** | Independent | 611 (69) | 821 (74) | 834 (83) | 774 (85) | 532 (88) |
|  | Home care | 65 (7) | 89 (8) | 82 (8) | 61 (7) | 20 (3) |
|  | Nursing home | 10 (1) | 12 (1) | 11 (1) | 19 (2) | 36 (6) |
|  | missing | 194 (22) | 192 (17) | 73 (7) | 53 (6) | 19 (3) |
| **TOBACCO** | None | 81 (9) | 102 (9) | 200 (20) | 206 (23) | 116 (19) |
|  | Previous | 80 (9) | 133 (12) | 218 (22) | 260 (29) | 216 (36) |
|  | Smoker | 274 (31) | 347 (31) | 383 (38) | 314 (35) | 196 (32) |
|  | missing | 445 (51) | 532 (48) | 199 (20) | 127 (14) | 79 (13) |
| **alcohol_abuse** | No | 468 (53) | 868 (78) | 905 (90) | 826 (91) | 561 (92) |
|  | > 5 units/day | 19 (2) | 19 (2) | 34 (3) | 39 (4) | 20 (3) |
|  | missing | 393 (45) | 227 (20) | 61 (6) | 42 (5) | 26 (4) |
| **PRIORITY** | Elective | 14 (2) | 10-15 (1) | 15 (2) | 9 (1) | 5 (1) |
|  | Subacute | 82 (9) | 123 (11) | 79 (8) | 42 (5) | 15 (2) |
|  | Acute | 604 (69) | 975 (88) | 906 (91) | 856 (94) | 587 (97) |
|  | missing | 180 (20) | <5 (0) | 0 (0) | 0 (0) | 0 (0) |
| **Region** | North | 110 (12) | 126 (11) | 130 (13) | 113 (12) | 80 (13) |
|  | Central | 172 (20) | 224 (20) | 178 (18) | 173 (19) | 110 (18) |
|  | South | 237 (27) | 293 (26) | 266 (27) | 321 (35) | 263 (43) |
|  | Capital | 298 (34) | 401 (36) | 415 (42) | 269 (30) | 144 (24) |
|  | Zealand | 63 (7) | 70 (6) | 11 (1) | 31 (3) | 10 (2) |
| **Technique** | Open | 875-885 (100) | 1,105-1,114 (100) | 990-999 (100) | 853 (94) | 560 (92) |
|  | Endovascular | <5 (0) | <5 (0) | <5 (0) | 54 (6) | 47 (8) |

### eTable 2b. Intact AAA

| **Intact AAA** | **Level** | **1996 - 1999 (n=1529)** | **2000 - 2004 (n=1824)** | **2005 - 2009 (n=2499)** | **2010 - 2014 (n=2792)** | **2015 - 2018 (n=2243)** |
| --- | --- | --- | --- | --- | --- | --- |
| **Age** | mean (sd) | 70 (7) | 70 (8) | 71 (7) | 72 (7) | 73 (7) |
| **Male_sex** | Yes | 1,269 (83) | 1,522 (83) | 2,060 (82) | 2,326 (83) | 1,895 (84) |
| **CCI_group** | Normal | 139 (9) | 115 (6) | 147 (6) | 134 (5) | 54 (2) |
|  | Moderate | 637 (42) | 761 (42) | 883 (35) | 956 (34) | 735 (33) |
|  | Severe | 389 (25) | 456 (25) | 610 (24) | 676 (24) | 556 (25) |
|  | Very Severe | 364 (24) | 492 (27) | 859 (34) | 1026 (37) | 898 (40) |
| **Dependency** | Independent | 1,360 (89) | 1,646 (90) | 2,336 (93) | 2,675 (96) | 2,114 (94) |
|  | Home care | 121 (8) | 129 (7) | 129 (5) | 79 (3) | 89 (4) |
|  | Nursing home | <5 (0) | <5 (0) | 8 (0) | 7 (0) | 5 (0) |
|  | missing | 35-45 (3) | 35-45 (2) | 26 (1) | 31 (1) | 35 (2) |
| **TOBACCO** | None | 207 (14) | 270 (15) | 386 (15) | 506 (18) | 421 (19) |
|  | Previous | 337 (22) | 536 (29) | 985 (39) | 1261 (45) | 1106 (49) |
|  | Smoker | 884 (58) | 930 (51) | 1078 (43) | 971 (35) | 664 (30) |
|  | missing | 101 (7) | 88 (5) | 50 (2) | 54 (2) | 52 (2) |
| **alcohol_abuse** | No | 1,047 (68) | 1,742 (96) | 2,392 (96) | 2,694 (96) | 2,147 (96) |
|  | > 5 units/day | 20 (1) | 40 (2) | 70 (3) | 55 (2) | 31 (1) |
|  | missing | 462 (30) | 42 (2) | 37 (1) | 43 (2) | 65 (3) |
| **PRIORITY** | Elective | 898 (59) | 1,532 (84) | 2,151 (86) | 2,379 (85) | 1,983 (88) |
|  | Subacute | 154 (10) | 204 (11) | 249 (10) | 249 (9) | 140 (6) |
|  | Acute | 101 (7) | 88 (5) | 99 (4) | 164 (6) | 110-120 (5) |
|  | missing | 376 (25) | 0 (0) | 0 (0) | 0 (0) | <5 (0) |
| **Region** | North | 173 (11) | 179 (10) | 204 (8) | 260 (9) | 228 (10) |
|  | Central | 359 (23) | 398 (22) | 536 (21) | 707 (25) | 454 (20) |
|  | South | 354 (23) | 532 (29) | 671 (27) | 884 (32) | 856 (38) |
|  | Capital | 516 (34) | 560 (31) | 968 (39) | 749 (27) | 571 (25) |
|  | Zealand | 127 (8) | 155 (8) | 120 (5) | 192 (7) | 134 (6) |
| **Technique** | Open | 1,498 (98) | 1,713 (94) | 1,918 (77) | 1,797 (64) | 1,292 (58) |
|  | Endovascular | 31 (2) | 111 (6) | 581 (23) | 995 (36) | 951 (42) |

## eTable 3. Sensitivity analyses of the AAA repair survival rates.

Sensitivity analyses of five- and one-year mortality hazard ratios by repair type, plot (above) and table with estimates (below)

| Follow time | Repair  type | Calendar  period | Model 1  Crude | Model 2  Primary analysis | Model 3  Second. analysis | Model 4  Complete cases |
| --- | --- | --- | --- | --- | --- | --- |
| Five-year | iAAA | 1996 - 2000 | Reference | Reference | Reference | Reference |
| Five-year | iAAA | 2001 - 2005 | 0.87 (0.78-0.97) | 0.80 (0.71-0.89) | 0.81 (0.72-0.91) | 0.83 (0.73-0.94) |
| Five-year | iAAA | 2006 - 2010 | 0.77 (0.69-0.85) | 0.64 (0.57-0.71) | 0.68 (0.61-0.77) | 0.69 (0.61-0.78) |
| Five-year | iAAA | 2011 - 2015 | 0.64 (0.58-0.72) | 0.52 (0.46-0.58) | 0.56 (0.49-0.63) | 0.56 (0.49-0.64) |
| Five-year | iAAA | 2016 - 2018 | 0.63 (0.54-0.75) | 0.50 (0.43-0.60) | 0.54 (0.46-0.65) | 0.57 (0.47-0.68) |
| Five-year | rAAA | 1996 - 2000 | Reference | Reference | Reference | Reference |
| Five-year | rAAA | 2001 - 2005 | 1.00 (0.90-1.11) | 0.94 (0.84-1.04) | 0.96 (0.86-1.07) | 0.98 (0.83-1.15) |
| Five-year | rAAA | 2006 - 2010 | 0.76 (0.68-0.85) | 0.72 (0.64-0.80) | 0.78 (0.69-0.89) | 0.75 (0.63-0.88) |
| Five-year | rAAA | 2011 - 2015 | 0.69 (0.62-0.78) | 0.61 (0.54-0.69) | 0.66 (0.58-0.75) | 0.65 (0.55-0.78) |
| Five-year | rAAA | 2016 - 2018 | 0.50 (0.42-0.61) | 0.46 (0.38-0.56) | 0.51 (0.42-0.61) | 0.52 (0.42-0.66) |
| One-year | iAAA | 1996 - 2000 | Reference | Reference | Reference | Reference |
| One-year | iAAA | 2001 - 2005 | 0.74 (0.61-0.90) | 0.71 (0.58-0.86) | 0.73 (0.59-0.90) | 0.74 (0.60-0.93) |
| One-year | iAAA | 2006 - 2010 | 0.64 (0.53-0.77) | 0.60 (0.50-0.73) | 0.65 (0.53-0.80) | 0.66 (0.53-0.82) |
| One-year | iAAA | 2011 - 2015 | 0.51 (0.42-0.62) | 0.49 (0.40-0.60) | 0.51 (0.41-0.64) | 0.54 (0.43-0.67) |
| One-year | iAAA | 2016 - 2018 | 0.46 (0.36-0.58) | 0.43 (0.33-0.55) | 0.45 (0.35-0.59) | 0.50 (0.38-0.66) |
| One-year | rAAA | 1996 - 2000 | Reference | Reference | Reference | Reference |
| One-year | rAAA | 2001 - 2005 | 1.04 (0.92-1.17) | 0.97 (0.86-1.09) | 1.00 (0.88-1.13) | 0.97 (0.80-1.17) |
| One-year | rAAA | 2006 - 2010 | 0.80 (0.70-0.91) | 0.75 (0.66-0.86) | 0.85 (0.74-0.99) | 0.78 (0.64-0.94) |
| One-year | rAAA | 2011 - 2015 | 0.62 (0.54-0.72) | 0.56 (0.49-0.65) | 0.63 (0.54-0.74) | 0.59 (0.48-0.73) |
| One-year | rAAA | 2016 - 2018 | 0.51 (0.42-0.62) | 0.46 (0.38-0.57) | 0.53 (0.43-0.65) | 0.51 (0.39-0.65) |

iAAA, intact AAA.

rAAA, ruptured AAA.

## eTable 4. Regression table of survival analyses

Note, extreme age groups, 41-50 years and 91-99 years, were included as parameters in the Cox regression model, but were not included in the Forest plots below, for clarity.

### eTable 4a. Ruptured AAA

### eTable 4b. Intact AAA.

# Miscellaneous

## CCI item coding used

Disease categories and the International Classification of Diseases codes used to calculate Charlson’s Comorbidity Index.

| **Disease category** | **Danish coding system 1977-1995** | **ICD-10**  **1996-2018** | **Score** |
| --- | --- | --- | --- |
| Myocardial infarction | 410 | I21, I23 | 1 |
| Congestive heart failure | 427.09; 427.10; 427.11; 427.19; 428.99; 782.49 | I50; I11.0; I13.0; I13.2 | 1 |
| Peripheral vascular disease | 440; 441; 442; 443; 444; 445 | I70- I74; I77 | 1 |
| Cerebrovascular disease | 430-438 | I60-I69; G45; G46 | 1 |
| Dementia | 290.09-290.19; 293.09 | F00-F03; F05.1; G30 | 1 |
| Chronic pulmonary disease | 490-493; 515-518 | J40-J47; J60-J67; J68.4; J70.1; J70.3; J84.1; J92.0; J96.1; J98.2-J98.3 | 1 |
| Connective tissue disease | 712; 716; 734; 446; 135.99 | M05; M06; M08; M09; M30-M36; D86 | 1 |
| Ulcer disease | 530.91; 530.98; 531-534 | K22.1; K25-K28 | 1 |
| Mild liver disease | 571; 573.01; 573.04 | B18; K70.0-K70.3; K70.9; K71; K73; K74; K76.0 | 1 |
| Diabetes | 249.00; 249.06; 249.07; 249.09; 250.00; 250.06; 250.07; 250.09 | E10.0; E10.1; E10.9; E11.0; E11.1; E11.9 | 1 |
| Hemiplegia | 344 | G81; G82 | 2 |
| Moderate to severe renal disease | 403; 404; 580-584; 590.09; 593.19; 753.10-753.19; 792 | I12; I13; N00-N05; N07; N11; N14; N17-N19; Q61 | 2 |
| Diabetes with end organ damage | 249.01-249.05; 249.08; 250.01-250.05; 250.08 | E10.2-E10.8;  E11.2-E11.8 | 2 |
| Any tumor | 140-194 | C00-C75 | 2 |
| Leukemia | 204-207 | C91-C95 | 2 |
| Lymphoma | 200-203; 275.59 | C81-C85; C88; C90; C96 | 2 |
| Moderate to severe liver disease | 070.00; 070.02; 070:04; 070.06; 070.08; 573.00; 456.00-456.09 | B15.0; B16.0; B16.2; B19.0; K70.4; K72; K76.6; I85 | 3 |
| Metastatic solid tumor | 195-199 | C76-C80 | 6 |
| AIDS | 079.83 | B21-B24 | 6 |

## ICD8-Criteria for excluding patients with AAA surgery prior to 1996:

1. Explicit operations codes for AAA surgery: ICD-8 codes 86550-5 and 86560
   **OR**
2. The combination of
   1. ICD-8 codes for aorto-iliac bypass surgery:
      86740, 86760, 87049-55, 87060, 87063, 87064, 87069
      **AND**
   2. A-diagnosis code consistent with AAA:
      ICD8: 44120-1, 44129
      ICD10: DI713, DI714

## Criteria for imputing the operation code from the Danish National Patient Registry based on substring match between the DNPR and DVR

Due to type errors, some of the operation codes registered in the DVR did not match the Scandinavian coding system. In that case we looked-up and imputed the operations code from the Danish National Patient Registry if it matched on *i)* patient identifier, *ii)* date, and *iii)* a substring-match a described below

| Imputation assumption / character match | No. of imputed cases / operation codes |
| --- | --- |
| Character 1to5 | 25 |
| Letters 1to4 | 56 |
| Character 4to6 | 97 |
| Character 12356 | 72 |
| Character 5to6 | 56 |
| Character char | 12 |
| SUM | 318 |

## Additional baseline characteristics coding

|  | DIAGNOSES | DIAGNOSES | SURGERY | SURGERY | Sks_ube* |
| --- | --- | --- | --- | --- | --- |
|  | Danish coding system 1977-1995 | ICD10  1996-2018 | Danish coding system 1977-1995 | Scandinavian coding system  1996-2018 |  |
| Angina history | 413; | I20 |  |  |  |
| Stroke or  TIA | 430; 431; 433; 434;  435;  43601; 43690 | I60-I64; I69 |  |  |  |
| PM/ICD/loop recorder | 99750 | T821;  T827I-P;  T828P;  Z450;  Z950 | 32122  32159  32199 | FPF-H | BFC |
| CABG/PCI |  |  | 300;301;  30200;  30240;  30350 | FN |  |
| Heart valve disease | 394-6;39700;  424 | I05-8;  I091, I091B  I098  I34-7  T820 | 303;  30600;  30620;  30640;  30729;  30780;  30799;  30800;  30810;  30920;  30925;  30939;  30959;  30990;  311;  31268-9;  Excl:30354,  30359 | FG; FJE;  FJF;  FJW;  FK;  FM |  |
| Cardiomyopathy | 42599 | I42-3 |  |  |  |

*Sks_ube is a Danish national patient registry database which contains records of examinations and procedures not considered surgical cases. I was used for additional baseline characterics in the period 1996-2018.

## Age trend by indication

## Age trend by indication and technique
